# Supplementary material for: End-of-life medical decisions in France: a death certificate follow-up survey 5 years after the 2005 act of parliament on patients’ rights and end of life
Source: BMC Palliat Care. 2012 Dec 3;11:25. doi: 10.1186/1472-684X-11-25 (PMC3543844; doi:10.1186/1472-684X-11-25)
Supplement: Additional file 2 — Questionnaire of the French survey on End-of-life. [file 1472-684X-11-25-S2.pdf]

## **Key questions regarding medical end-of-life decisions in the French survey on end of life (La Fin de vie en France 2010)**

- 1. Did you first of all do everything possible to prevent the death?*
- 2. Did you take the decision to withhold a treatment that could have prolonged life?*
  - a. Did you take into account the fact that this decision may hasten the death?*
  - b. Did you have the deliberate intention to hasten the death?*
  - c. Do you think this decision has hastened the death?*
- 3. Did you take the decision to withdraw a treatment that could have prolonged life?*
  - a. Did you take into account the fact that this decision may hasten the death?*
  - b. Did you have the deliberate intention to hasten the death?*
  - c. Do you think this decision has hastened the death?*
- 4. Did you take the decision to intensify the treatment of pain and/or symptoms with one or more medication?*
  - a. Did you take into account the fact that this decision may hasten the death?*
  - b. Did you have the deliberate intention to hasten the death?*
  - c. Do you think this decision has hastened the death?*
- 5. Did you take the decision to use one or more medications to deliberately end the person's life?*

<sup>1</sup> Situation in which a third party intentionally ends a person's life, at his/her request, in order to end a situation that the person considers to be intolerable (ONFV, 2012)
